# Supplementary material
Source: PubMed Central journal article supplement (PMC3993678)
Supplement: JCM.02531-13_zjm999093297so1.pdf [file JCM.02531-13_zjm999093297so1.pdf]

## Supplemental Material

| Allele (# repeats)             | MS1          | MS2                          | MS3                                 | MS4                            | MS5        | MS6                        | MS7                             | MS8                                    | MS9                   |
|--------------------------------|--------------|------------------------------|-------------------------------------|--------------------------------|------------|----------------------------|---------------------------------|----------------------------------------|-----------------------|
| 2                              |              |                              |                                     |                                | 13         |                            |                                 |                                        |                       |
| 3                              |              |                              |                                     |                                | 12         |                            |                                 |                                        |                       |
| 4                              | 1            |                              |                                     |                                | 2          | 1                          |                                 |                                        |                       |
| 5                              | 7            | 2                            |                                     |                                |            |                            |                                 | 4                                      |                       |
| 6                              |              | 9                            |                                     |                                |            |                            |                                 | 24                                     |                       |
| 7                              |              | 31                           | 1                                   | 3                              |            | 1                          |                                 | 3                                      |                       |
| 8                              | 17           | 43                           | 21                                  | 33                             | 1          | 7                          |                                 | 2                                      | 2                     |
| 9                              | 41           | 1                            | 47                                  | 33                             | 4          | 11                         | 5                               | 10                                     | 5                     |
| 10                             | 17           |                              |                                     | 9                              | 41         | 16                         | 30                              | 15                                     | 56                    |
| 11                             | 6            |                              |                                     | 3                              | 9          | 20                         | 28                              | 5                                      | 10                    |
| 12                             |              |                              |                                     | 1                              | 2          | 9                          | 17                              | 1                                      | 6                     |
| 13                             |              |                              | 2                                   | 1                              |            | 10                         | 4                               | 1                                      | 1                     |
| 14                             |              |                              | 7                                   |                                |            | 1                          |                                 |                                        |                       |
| 15                             |              |                              | 4                                   |                                |            |                            |                                 | 3                                      |                       |
| 16                             |              |                              | 1                                   |                                |            |                            |                                 | 3                                      |                       |
| <b><math>N^\diamond</math></b> | 89           | 86                           | 83                                  | 83                             | 84         | 76                         | 84                              | 71                                     | 80                    |
| <b>Alleles<sup>*</sup></b>     | 6            | 5                            | 7                                   | 7                              | 8          | 9                          | 5                               | 11                                     | 6                     |
| <b>Range<sup>*</sup></b>       | 4-11         | 5-9                          | 7-16                                | 7-13                           | 2-12       | 4-14                       | 9-13                            | 5-16                                   | 8-13                  |
| <b>Mean <math>H_e</math></b>   | 0.688        | 0.586                        | 0.667                               | 0.607                          | 0.620      | 0.842                      | 0.709                           | 0.789                                  | 0.449                 |
| <b>% Amp<sup>†</sup></b>       | 97.8         | 94.5                         | 91.2                                | 91.2                           | 92.3       | 83.5                       | 92.3                            | 78.0                                   | 87.9                  |
| <b>(Type)<sub>N</sub></b>      | TA           | GAT                          | AT                                  | TAT                            | AT         | TA                         | TA                              | TA                                     | TA                    |
| <b>Domain<sup>‡</sup></b>      | 3'UTR        | Coding                       | 5'UTR                               | 3'UTR                          | N/A        | Intron                     | Intron                          | 3'UTR                                  | 3'UTR                 |
| <b>Gene Name</b>               | Undetermined | RING-finger membrane protein | RNA-binding protein ISN1 (putative) | Sec7-domain containing protein | Intergenic | Aspartate aminotransferase | Serine hydroxymethyltransferase | E3 ubiquitin protein ligase (putative) | ATPase WRNIP1 homolog |

**Table S1. Summary characteristic by locus: number of isolates typed, range and frequency of alleles, expected heterozygosity.**  $\diamond$ Total number of *Pneumocystis jirovecii* isolates. <sup>\*</sup>Number of unique alleles.

<sup>\*</sup>Range of repeat lengths detected. <sup>†</sup>A measure of locus genotyping robustness: the per-locus success rate for PCR and capillary electrophoresis. <sup>‡</sup>Microsatellite location within predicted gene.

| Population Type                  | Sample ID               | <i>dhps</i> Genotype* | MS9 Genotype <sup>†</sup> |
|----------------------------------|-------------------------|-----------------------|---------------------------|
| Uganda<br>Single Mutant          | UG02                    | THR-ARG-SER           | 10                        |
|                                  | UG03                    | THR-ARG-SER           | 10                        |
|                                  | UG04                    | THR-ARG-SER           | 10                        |
|                                  | UG06                    | THR-ARG-SER           | 10                        |
|                                  | UG07                    | THR-ARG-SER           | 10                        |
|                                  | UG08                    | THR-ARG-SER           | 9                         |
|                                  | UG09                    | THR-ARG-SER           | 9                         |
|                                  | UG12                    | THR-ARG-SER           | 10                        |
|                                  | UG13                    | THR-ARG-SER           | 10                        |
|                                  | Uganda<br>Double Mutant | UG10                  | ALA-ARG-SER               |
| UG11                             |                         | ALA-ARG-SER           | 10                        |
| San Francisco<br>Single Mutant   | SF13                    | ALA-ARG-PRO           | 11                        |
|                                  | SF47-1                  | THR-ARG-SER           | 12                        |
|                                  | SF47-2                  | THR-ARG-SER           | 11                        |
| San Francisco –<br>Double Mutant | SF05                    | ALA-ARG-SER           | 10                        |
|                                  | SF11                    | ALA-ARG-SER           | 10                        |
|                                  | SF12                    | ALA-ARG-SER           | 10                        |
|                                  | SF19                    | ALA-ARG-SER           | 10                        |
|                                  | SF22                    | ALA-ARG-SER           | 10                        |
|                                  | SF27                    | ALA-ARG-SER           | 10                        |
|                                  | SF30                    | ALA-ARG-SER           | 12                        |
|                                  | SF48-1                  | ALA-ARG-SER           | 9                         |
|                                  | SF48-2                  | ALA-ARG-SER           | 9                         |
|                                  | SF49-1                  | ALA-ARG-SER           | 10                        |
| SF49-2                           | ALA-ARG-SER             | 8                     |                           |

**Table S2. Microsatellite #9 (MS9)-*dihydropteroate synthase (dhps)* haplotypes among Ugandan and San Franciscan isolates.** 11 samples from Uganda and 14 samples from San Francisco had unambiguous and non-mixed genotype calls at both MS9 and *dhps*, allowing the construction of two-locus haplotypes.

\*Wildtype amino-acid sequence at the *dhps* locus is THR-ARG-PRO. <sup>†</sup>Genotype calls represent absolute number of dinucleotide repeats.

|                                           |              |              |              |              |              |                  |                  |                  |
|-------------------------------------------|--------------|--------------|--------------|--------------|--------------|------------------|------------------|------------------|
| <b>Simpson's D<br/>from H<sub>e</sub></b> | <b>0.793</b> | <b>0.972</b> | <b>0.991</b> | <b>0.997</b> | <b>0.999</b> | <b>&gt;0.999</b> | <b>&gt;0.999</b> | <b>&gt;0.999</b> |
|                                           | MS6          | MS6          | MS6          | MS6          | MS6          | MS6              | MS6              | MS6              |
|                                           |              | MS8          | MS8          | MS8          | MS8          | MS8              | MS8              | MS8              |
|                                           |              |              | MS7          | MS7          | MS7          | MS7              | MS7              | MS7              |
|                                           |              |              |              | MS1          | MS1          | MS1              | MS1              | MS1              |
|                                           |              |              |              |              | MS3          | MS3              | MS3              | MS3              |
|                                           |              |              |              |              |              | MS5              | MS5              | MS5              |
|                                           |              |              |              |              |              |                  | MS4              | MS4              |
|                                           |              |              |              |              |              |                  |                  | MS2              |
| <b>Simpson's D<br/>from %Amp</b>          | <b>0.683</b> | <b>0.900</b> | <b>0.972</b> | <b>0.991</b> | <b>0.996</b> | <b>0.998</b>     | <b>&gt;0.999</b> | <b>&gt;0.999</b> |
|                                           | MS1          | MS1          | MS1          | MS1          | MS1          | MS1              | MS1              | MS1              |
|                                           |              | MS2          | MS2          | MS2          | MS2          | MS2              | MS2              | MS2              |
|                                           |              |              | MS7          | MS7          | MS7          | MS7              | MS7              | MS7              |
|                                           |              |              |              | MS5          | MS5          | MS5              | MS5              | MS5              |
|                                           |              |              |              |              | MS3          | MS3              | MS3              | MS3              |
|                                           |              |              |              |              |              | MS4              | MS4              | MS4              |
|                                           |              |              |              |              |              |                  | MS6              | MS6              |
|                                           |              |              |              |              |              |                  |                  | MS8              |

**Table S3. Simpson's Index of Diversity (D) for combinations of microsatellite markers in order of decreasing heterozygosity (H<sub>e</sub>, upper panel) and decreasing marker robustness (%Amp, lower panel).** MS6 had the highest heterozygosity (see **Figure 1, Table S1**), MS8 had the second highest heterozygosity, and so on. MS1 had the highest PCR and capillary electrophoresis success rate (**Table S1**), MS7 had the second highest, and so on. Two recommended multilocus genotyping schemes are shaded (grey) that achieved high resolution between isolates in our sample set (Simpson's D≥0.999) with the minimal number of loci.

| Isolate | MS1 | MS3            | MS5 | MS6 | MS7 | MS8            | Date     |
|---------|-----|----------------|-----|-----|-----|----------------|----------|
| SF45-1  | 9   | 9              | 2   | 8   | 11  | 11             | 7/05/11* |
| SF45-2  | 9   | 9              | 2   | 8   | 11  | 11             | 7/05/11* |
| SF46-1  | 9   | 9              | 12  | 12  | 13  | 9              | 04/01/10 |
| SF46-2  | 9   | 9              | 12  | 12  | 13  | 9              | 04/16/10 |
| SF47-1  | 10  | 15             | 10  | 11  | 10  | 6              | 04/20/09 |
| SF47-2  | 10  | 8              | 10  | 11  | 10  | 6              | 05/13/09 |
| SF48-1  | 5   | 9              | 3   | 9   | 10  | 0 <sup>†</sup> | 08/06/07 |
| SF48-2  | 5   | 9              | 3   | 9   | 9   | 0 <sup>†</sup> | 10/10/07 |
| SF49-1  | 9   | 16             | 11  | 14  | 10  | 12             | 10/25/05 |
| SF49-2  | 9   | 0 <sup>†</sup> | 11  | 12  | 10  | 0 <sup>†</sup> | 03/20/06 |

**Table S4. Paired sample genotypes.** Integers represent the absolute number of repeating di- or tri-nucleotide microsatellite units. 1 sample pair (SF45-#) was collected on the same date from different lung lobes of the same patient, while 4 sample pairs were collected from the same patient on different dates. \*Samples collected from the same patient on the same date were from different lung lobes (RUL and LLL, respectively). <sup>†</sup>A value of zero indicates missing data.

|            |                          |                                                           |
|------------|--------------------------|-----------------------------------------------------------|
| <b>MS2</b> | CAKM01000171:22454-22507 | TGAAATTAGATGATGATGATGATGATGATGATATAGTTTTCAATAAAAGAGATG    |
|            | KF499045 Uganda_1        | TGAAATTAGATGATGATGATGATGATGATGAT---ATAGTTTTCAATAAAAGAGATG |
|            | KF499046 Uganda_2        | TGAAATTAGATGATGATGATGATGATGATGATGATATAGTTTTCAATAAAAGAGATG |
|            | KF499047 SanFran_1       | TGAAATTAGATGATGATGATGATGATGAT-----ATAGTTTTCAATAAAAGAGATG  |

**Figure S1. Partial sequence alignments of a microsatellite in a predicted coding region.** One microsatellite (MS2) falls within the predicted coding region of the RING-finger membrane protein. Three isolates from Uganda and San Francisco were Sanger sequenced and compared to the reference contig sequence to confirm that the locus is polymorphic in its repeat number.
